# Supplementary material
Source: PubMed Central journal article supplement (PMC5767857)
Supplement: 10.1074_M117.797209_jbc.M117.797209-1.pdf [file 10.1074_M117.797209_jbc.M117.797209-1.pdf]

## **SUPPLEMENTARY DATA**

Dynamic Energy Dependency of *Chlamydia trachomatis* on Host Cell Metabolism during Different Stages of Intracellular Growth: Possible role of Sodium -based energetics in Chlamydial ATP generation

**Pingdong Liang, Mónica Rosas-Lemus, Dhvani Patel, Xuan Fang, Karina Tuz and Oscar Juárez**

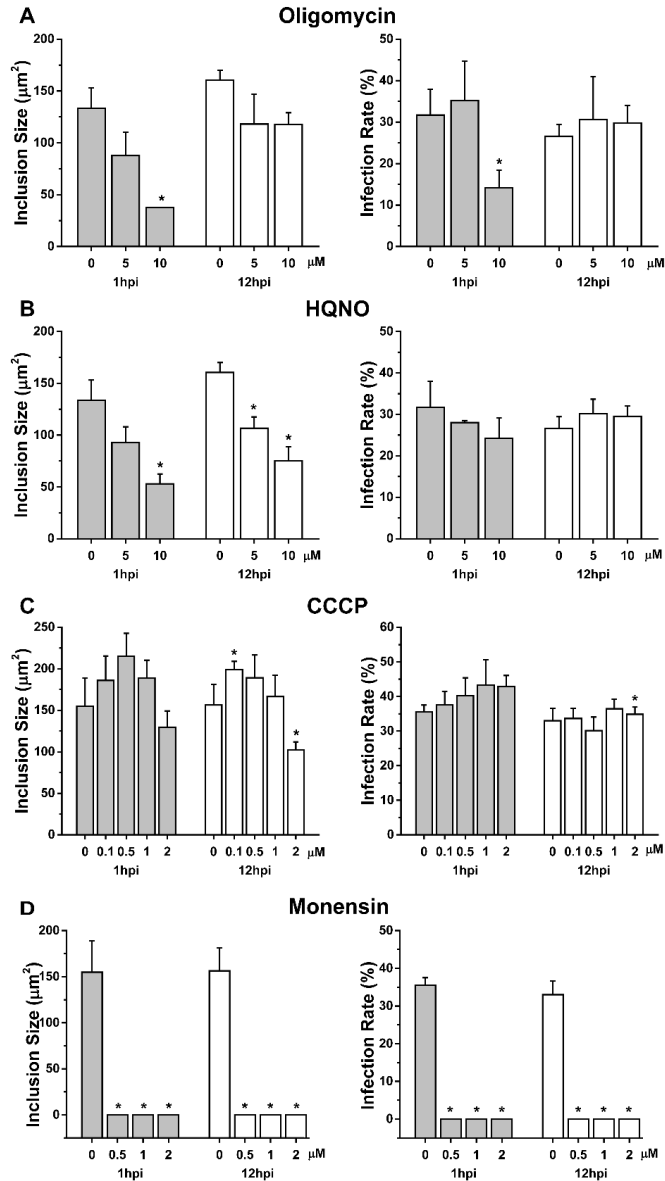

**Figure S1.** Effects of respiratory chain inhibitors and ionophores on Chlamydial infection in HeLa cells. The inclusion size and the infection rate of *C. trachomatis*-infected HeLa cells were evaluated at 36 hpi by analyzing the immunofluorescence of cells cultures stained with anti-MOMP antibodies and secondary fluorescently labeled antibodies. 200 inclusions were measured per condition per experiment using Image J. A) Oligomycin 0, 5, 10 µM; B) HQNO 0, 5, 10 µM; C) CCCP 0, 0.1, 0.5, 1, 2 µM; and D) Monensin 0, 0.5, 1, 2 µM were added at 1 hpi or 12 hpi. Error bars indicate the standard deviation of the mean, n = 3. Asterisk denotes significance from vehicle-treated control. \*, p<0.05.

**A Drug Treatment at 1hpi**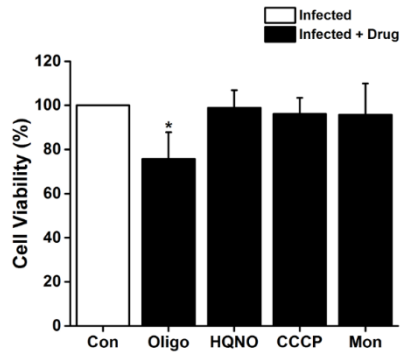**B Drug Treatment at 12hpi**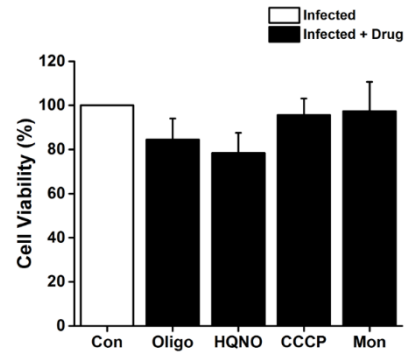

**Figure S2.** Viability of *C. trachomatis*-infected HeLa cells. Infected HeLa cells were treated with 10  $\mu$ M Oligomycin A (Oligo), 10  $\mu$ M HQNO, 2  $\mu$ M CCCP or 2  $\mu$ M monensin (Mon) at 1 hpi or 12 hpi and stained with HEMA 3 staining at 36 hpi. The number of cells per field were quantified in at least 5 random fields per sample. Results are expressed as mean  $\pm$  S.D. of 3 different experiments per condition. Asterisk denotes significance from vehicle-treated control (Con). \* $p < 0.05$ .

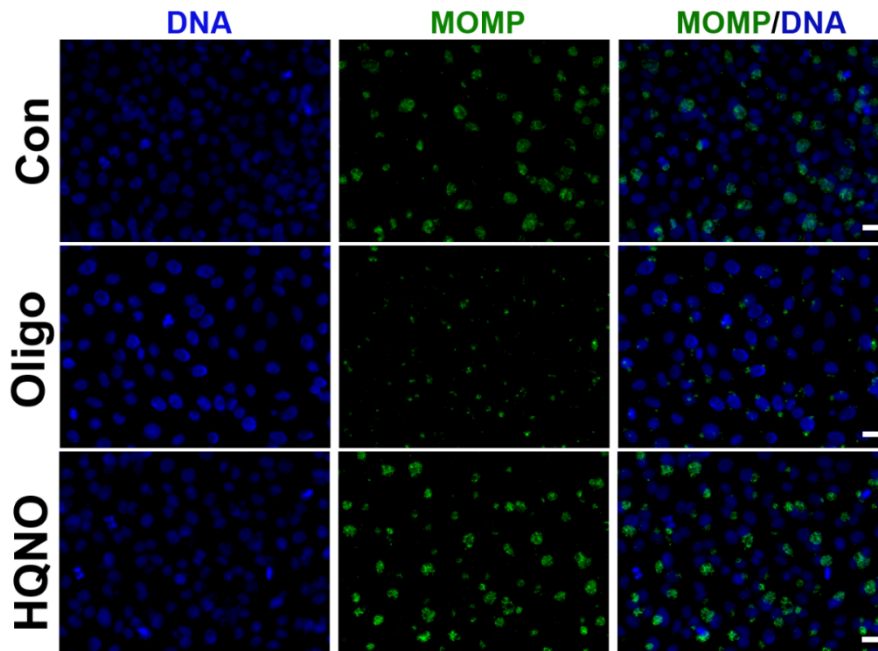

**Figure S3.** Immunofluorescence images of *Chlamydia trachomatis*-infected HeLa cells treated with respiratory inhibitors at 1 hpi. Representative images of *C. trachomatis*-infected HeLa cultures treated with 10  $\mu$ M Oligomycin A (Oligo) or 10  $\mu$ M HQNO at 1 hpi and immunostained with anti-MOMP antibodies (green) at 36 hpi. DNA is visualized with Hoechst 33342 (blue). Scale bars represent 20  $\mu$ m. MOMP/DNA merged images correspond to those in Fig. 4A. Fluorescent channels are shown separately for clarity.

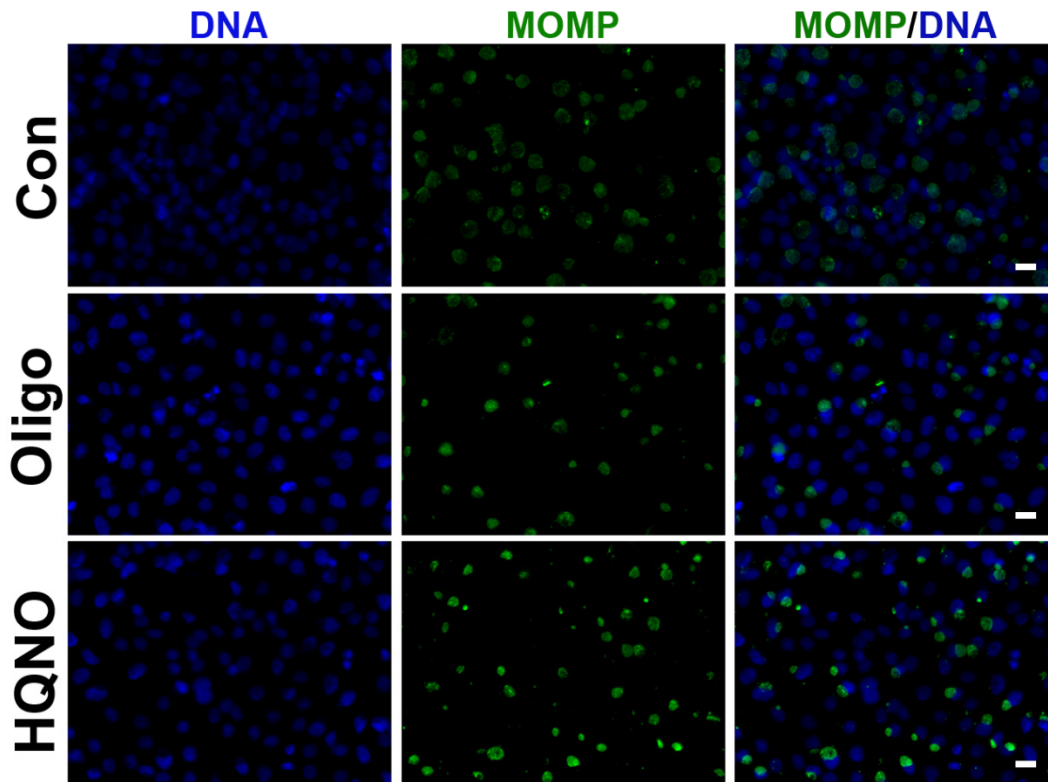

**Figure S4.** Immunofluorescence images of *C. trachomatis*-infected HeLa cells treated with respiratory inhibitors at 12 hpi. *C. trachomatis*-infected HeLa cells were treated with 10  $\mu$ M of oligomycin A (Oligo) or HQNO at 12 hpi and immunostained with anti-MOMP antibodies (green) at 36 hpi. DNA was labeled with Hoechst 33342 (blue). Scale bars indicate 20  $\mu$ m. Merged images correspond to those in Fig. 4B.

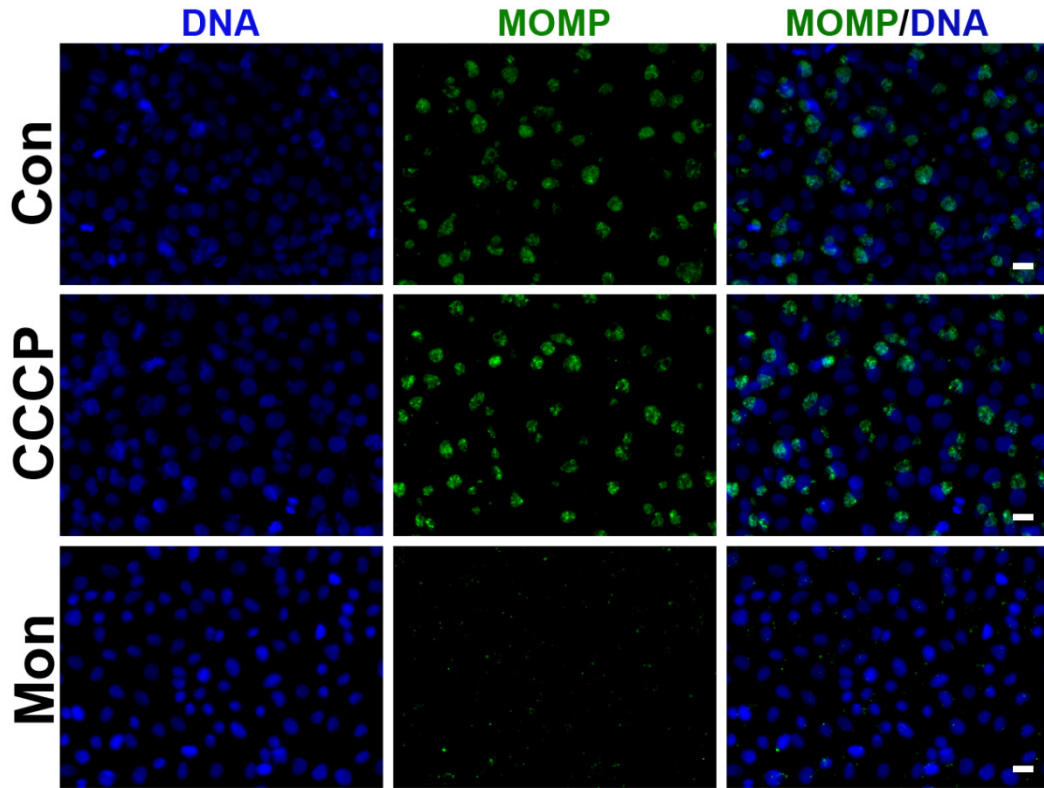

**Figure S5.** *C. trachomatis*-infected HeLa cells treated with ionophores at 1 hpi. Representative immunofluorescent images of *Chlamydia trachomatis*-infected HeLa cultures treated with 2  $\mu$ M monensin (Mon) or CCCP at 1 hpi and immunostained with anti-MOMP antibodies (green) at 36 hpi. DNA is visualized with Hoechst 33342 (blue). MOMP/DNA merged images are the same shown in Fig. 6A. Scale bars = 20  $\mu$ m.

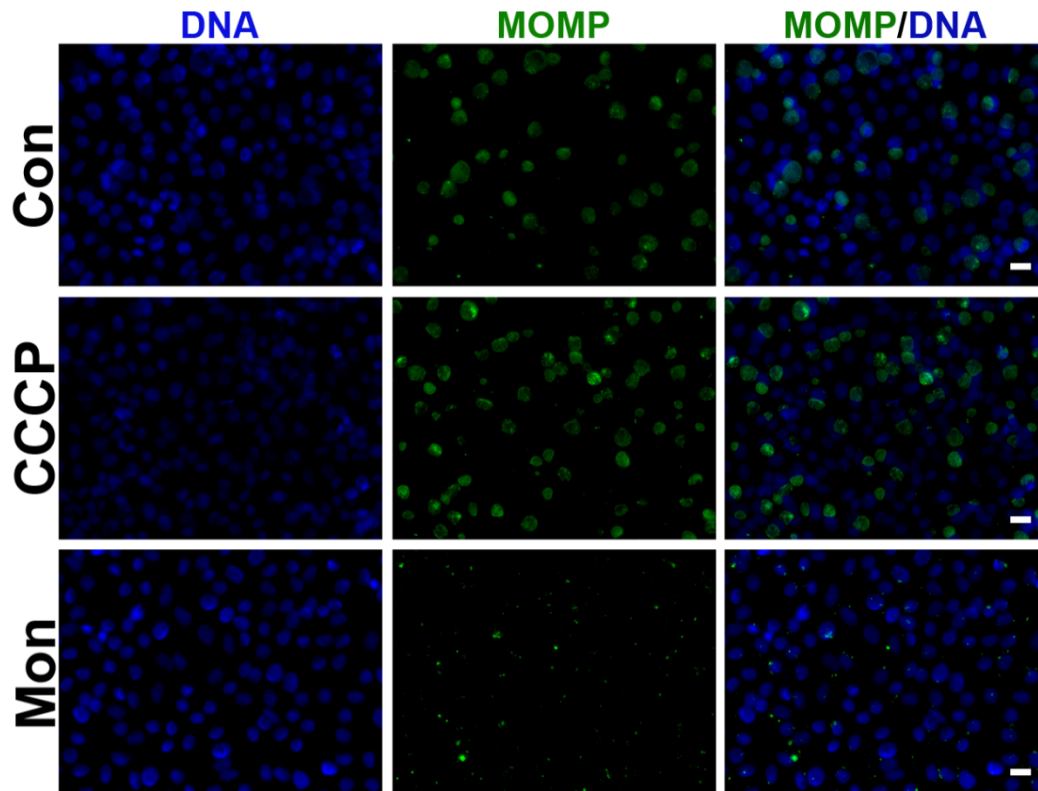

**Figure S6.** *C. trachomatis*-infected HeLa cells treated with ionophores at 12 hpi. Representative immunofluorescent images of *C. trachomatis*-infected HeLa cultures treated with 2  $\mu$ M monensin (Mon) or CCCP at 12 hpi and immunostained with anti-MOMP antibodies (green) at 36 hpi. DNA was labeled with Hoechst 33342 (blue). Merged images are the same as in Fig. 6B. Scale bars = 20  $\mu$ m.
